# Supplementary material for: Optimization of HIV Sequencing Method Using Vela Sentosa Library on Miseq Ilumina Platform
Source: Preprints.org preprint supplement (doi:10.20944/preprints202401.1643.v1), 2024-01-23
Supplement: Supplementary file 1 [file supplementary]

Sample ID: CQ012022\_Miseq

Source ID: CQ012022\_Miseq

MID: n.a.

Subtype: F2

## Drug resistances

Drug resistance algorithm: ANRS (2022.33/sg/b)

### Nucleoside Reverse Transcriptase Inhibitors (NRTI)

| Drug    | Mutations list                                                      | Range | Color | Interpretation  |
|---------|---------------------------------------------------------------------|-------|-------|-----------------|
| 3TC_FTC |                                                                     | 1     |       | S - Susceptible |
| ABC     | 41L (100.0%), 67N (94.2%), 74V (100.0%), 215F (99.7%)               | 3     |       | R - Resistance  |
| ISL     |                                                                     | 1     |       | S - Susceptible |
| TDF_TAF | 41L (100.0%), 67N (94.2%), 69D (96.6%), 74V (100.0%), 215F (99.7%)  | 3     |       | R - Resistance  |
| ZDV     | 41L (100.0%), 67N (94.2%), 70R (98.0%), 215F (99.7%), 219Q (100.0%) | 3     |       | R - Resistance  |

### Non-Nucleoside Reverse Transcriptase Inhibitors (NNRTI)

| Drug | Mutations list               | Range | Color | Interpretation          |
|------|------------------------------|-------|-------|-------------------------|
| DOR  | 181C (100.0%), 190A (100.0%) | 2     |       | I - Possible resistance |
| EFV  | 181C (100.0%), 190A (100.0%) | 3     |       | R - Resistance          |
| ETR  | 181C (100.0%), 190A (100.0%) | 3     |       | R - Resistance          |
| NVP  | 181C (100.0%), 190A (100.0%) | 3     |       | R - Resistance          |
| RPV  | 181C (100.0%)                | 3     |       | R - Resistance          |

### Protease Inhibitors (PI)

| Drug        | Mutations list                                                                    | Range | Color | Interpretation  |
|-------------|-----------------------------------------------------------------------------------|-------|-------|-----------------|
| ATV_RTV     | 10V (100.0%), 16E (99.6%), 33F (100.0%), 90M (100.0%)                             | 3     |       | R - Resistance  |
| DRV_RTV_BID | 33F (100.0%)                                                                      | 1     |       | S - Susceptible |
| DRV_RTV_QD  | 33F (100.0%)                                                                      | 1     |       | S - Susceptible |
| LPVr        | 10V (100.0%), 33F (100.0%), 53L (99.6%), 54V (100.0%), 82F (100.0%), 90M (100.0%) | 3     |       | R - Resistance  |

### Integrase Strand Transfer Inhibitors (INSTI)

| Drug    | Mutations list | Range | Color | Interpretation  |
|---------|----------------|-------|-------|-----------------|
| BIC     |                | 1     |       | S - Susceptible |
| CAB     |                | 1     |       | S - Susceptible |
| DTG_BID |                | 1     |       | S - Susceptible |
| DTG_QD  |                | 1     |       | S - Susceptible |
| EVG     |                | 1     |       | S - Susceptible |
| RAL     |                | 1     |       | S - Susceptible |

## Auto-genotyping results

### HIV-1 PR

Consensus length : 297

| Rank | Subtype | AC | Score | Match-length | Similarity [%] | Mismatches |
|------|---------|----|-------|--------------|----------------|------------|
|------|---------|----|-------|--------------|----------------|------------|

Signature(s)

Sample ID: CQ012022\_Miseq

Source ID: CQ012022\_Miseq

MID: n.a.

Subtype: F2

|   |    |          |     |     |      |    |
|---|----|----------|-----|-----|------|----|
| 1 | F1 | FJ900268 | 365 | 296 | 90.5 | 28 |
| 2 | F1 | DQ979024 | 365 | 296 | 90.5 | 28 |
| 3 | F1 | DQ979025 | 357 | 296 | 90.2 | 29 |
| 4 | F1 | FJ900266 | 333 | 296 | 89.2 | 32 |
| 5 | F1 | FJ900267 | 333 | 296 | 89.2 | 32 |

**HIV-1 RT**

Consensus length : 1 620

| Rank | Subtype   | AC       | Score | Match-length | Similarity [%] | Mismatches |
|------|-----------|----------|-------|--------------|----------------|------------|
| 1    | F2        | AJ249236 | 1 989 | 1 617        | 90.6           | 150        |
| 2    | F2        | MN153483 | 1 971 | 1 616        | 90.3           | 156        |
| 3    | F2        | KU749420 | 1 971 | 1 616        | 90.3           | 156        |
| 4    | CRF46_BF1 | MG365771 | 1 965 | 1 621        | 90.4           | 154        |
| 5    | F1        | FJ771008 | 1 955 | 1 620        | 90.2           | 159        |

**HIV-1 IN**

Consensus length : 864

| Rank | Subtype | AC       | Score | Match-length | Similarity [%] | Mismatches |
|------|---------|----------|-------|--------------|----------------|------------|
| 1    | F2      | MN153485 | 1 302 | 861          | 94.1           | 51         |
| 2    | D       | AF484497 | 1 302 | 849          | 94.3           | 48         |
| 3    | A4      | AM000054 | 1 302 | 861          | 94.1           | 51         |
| 4    | F2      | AJ249236 | 1 287 | 861          | 93.8           | 53         |
| 5    | F1      | FJ900267 | 1 287 | 861          | 93.8           | 53         |

**Detailed information**

|                                    |                                                                                                                                                                                                                                                                                                  |
|------------------------------------|--------------------------------------------------------------------------------------------------------------------------------------------------------------------------------------------------------------------------------------------------------------------------------------------------|
| <b>IDNS5 version</b>               | v3.13.0                                                                                                                                                                                                                                                                                          |
| <b>Drug resistance algorithm</b>   | ANRS (2022.33/sg/b)                                                                                                                                                                                                                                                                              |
| <b>Pipeline name</b>               | HIV-1 PR+RT_frag+IN                                                                                                                                                                                                                                                                              |
| <b>Pipeline version</b>            | 2.8.0_HIV1_v1.6                                                                                                                                                                                                                                                                                  |
| <b>Genotyping database version</b> | HIV1_r23u051                                                                                                                                                                                                                                                                                     |
| <b>Noise filter [%]</b>            | 0.5                                                                                                                                                                                                                                                                                              |
| <b>Interpretation cutoff [%]</b>   | 20.0                                                                                                                                                                                                                                                                                             |
| <b>Min. read depth [# reads]</b>   | 50                                                                                                                                                                                                                                                                                               |
| <b>Number of input reads</b>       | 1 005 152                                                                                                                                                                                                                                                                                        |
| <b>Number of reads mapped</b>      | 558 531                                                                                                                                                                                                                                                                                          |
| <b>Mutations HIV-1 PR [(%)]</b>    | 3I (100.0), 10V (100.0), 12I (98.5), 13V (100.0), 15V (100.0), 16E (99.6), 20V (98.6), 33F (100.0), 35N (99.7), 36I (100.0), 37N (100.0), 39Q (100.0), 41K (99.6), 45V (100.0), 53L (99.6), 54V (100.0), 57K (99.5), 62V (100.0), 63T (100.0), 74A (100.0), 82F (100.0), 89M (86.4), 90M (100.0) |

Signature(s)

Sample ID: CQ012022\_Miseq

Source ID: CQ012022\_Miseq

MID: n.a.

Subtype: F2

**Mutations HIV-1 RT [(%)]**

20R (100.0), 35T (100.0), 39M (100.0), 41L (100.0), 67N (94.2), 69D (96.6), 70R (98.0), 74V (100.0), 75T (99.7), 101Q (99.6), 118I (99.6), 171Y (99.6), 173T (99.5), 174K (100.0), 177E (100.0), 178L (99.6), 181C (100.0), 190A (100.0), 203K (99.6), 207E (100.0), 208Y (100.0), 211A (100.0), 215F (99.7), 219Q (100.0), 223Q (100.0), 228H (99.7), 245Q (100.0), 248D (99.6), 250E (100.0), 277K (99.4), 283I (100.0), 286A (100.0), 291D (99.5), 292I (99.5), 293V (100.0), 297Q (99.1), 324E (100.0), 333D (99.7), 334H (100.0), 356K (100.0), 359S (99.5), 365I (100.0), 376C (100.0), 386I (60.0), 390R (100.0), 399G (99.7), 411L (100.0), 431T (100.0), 449Q (100.0), 451R (100.0), 452E (100.0), 460D (100.0), 466A (99.6), 468S (100.0), 483H (98.1), 491S (98.3), 512K (100.0), 527Q (99.2), 534S (100.0)

**Mutations HIV-1 IN [(%)]**

3E (100.0), 7R (100.0), 10E (100.0), 17N (100.0), 100Y (99.7), 101I (100.0), 112V (100.0), 119P (100.0), 123S (100.0), 125A (100.0), 127K (100.0), 136Q (100.0), 205S (100.0), 218I (99.3), 232D (100.0), 234I (99.4), 255N (99.6), 256E (100.0), 283G (99.5), 288N (95.2)

**Created by**

CH Versailles

**Signature(s)**

Sample ID: CQ022022\_Miseq

Source ID: CQ022022\_Miseq

MID: n.a.

Subtype: B

## Drug resistances

Drug resistance algorithm: ANRS (2022.33/sg/b)

### Nucleoside Reverse Transcriptase Inhibitors (NRTI)

| Drug    | Mutations list                                                                              | Range | Color | Interpretation  |
|---------|---------------------------------------------------------------------------------------------|-------|-------|-----------------|
| 3TC_FTC | 65R (42.0%)                                                                                 | 3     |       | R - Resistance  |
| ABC     | 41L (100.0%), 65R (42.0%), 67N (57.8%), 74I (99.0%), 215V (99.5%)                           | 3     |       | R - Resistance  |
| ISL     |                                                                                             | 1     |       | S - Susceptible |
| TDF_TAF | 41L (100.0%), 65R (42.0%), 67N (57.8%), 69D (66.3%), 69N (33.1%), 74I (99.0%), 215V (99.5%) | 3     |       | R - Resistance  |
| ZDV     | 41L (100.0%), 67N (57.8%), 215V (99.5%), 219Q (99.4%)                                       | 3     |       | R - Resistance  |

### Non-Nucleoside Reverse Transcriptase Inhibitors (NNRTI)

| Drug | Mutations list | Range | Color | Interpretation  |
|------|----------------|-------|-------|-----------------|
| DOR  | 181C (100.0%)  | 1     |       | S - Susceptible |
| EFV  | 181C (100.0%)  | 3     |       | R - Resistance  |
| ETR  | 181C (100.0%)  | 3     |       | R - Resistance  |
| NVP  | 181C (100.0%)  | 3     |       | R - Resistance  |
| RPV  | 181C (100.0%)  | 3     |       | R - Resistance  |

### Protease Inhibitors (PI)

| Drug        | Mutations list                                                                                                              | Range | Color | Interpretation          |
|-------------|-----------------------------------------------------------------------------------------------------------------------------|-------|-------|-------------------------|
| ATV_RTV     | 10V (100.0%), 33F (100.0%), 46L (99.8%), 60E (100.0%), 71V (100.0%), 84V (100.0%)                                           | 3     |       | R - Resistance          |
| DRV_RTV_BID | 11I (100.0%), 33F (100.0%), 84V (100.0%)                                                                                    | 2     |       | I - Possible resistance |
| DRV_RTV_QD  | 11I (100.0%), 33F (100.0%), 84V (100.0%)                                                                                    | 3     |       | R - Resistance          |
| LPVr        | 10V (100.0%), 24I (100.0%), 33F (100.0%), 46L (99.8%), 54V (100.0%), 63P (100.0%), 71V (100.0%), 82A (100.0%), 84V (100.0%) | 3     |       | R - Resistance          |

### Integrase Strand Transfer Inhibitors (INSTI)

| Drug    | Mutations list | Range | Color | Interpretation  |
|---------|----------------|-------|-------|-----------------|
| BIC     |                | 1     |       | S - Susceptible |
| CAB     |                | 1     |       | S - Susceptible |
| DTG_BID |                | 1     |       | S - Susceptible |
| DTG_QD  |                | 1     |       | S - Susceptible |
| EVG     |                | 1     |       | S - Susceptible |
| RAL     |                | 1     |       | S - Susceptible |

## Auto-genotyping results

HIV-1 PR

Consensus length : 297

Signature(s)

Sample ID: CQ022022\_Miseq

Source ID: CQ022022\_Miseq

MID: n.a.

Subtype: B

| Rank | Subtype | AC       | Score | Match-length | Similarity [%] | Mismatches |
|------|---------|----------|-------|--------------|----------------|------------|
| 1    | B       | MG572010 | 414   | 297          | 92.6           | 22         |
| 2    | B       | AF538303 | 414   | 297          | 92.6           | 22         |
| 3    | B       | AY835758 | 414   | 297          | 92.6           | 22         |
| 4    | BD      | MH234642 | 406   | 297          | 92.3           | 23         |
| 5    | B       | KY112061 | 406   | 297          | 92.3           | 23         |

**HIV-1 RT**

Consensus length : 1 620

| Rank | Subtype | AC       | Score | Match-length | Similarity [%] | Mismatches |
|------|---------|----------|-------|--------------|----------------|------------|
| 1    | B       | D10112   | 2 397 | 1 620        | 93.5           | 106        |
| 2    | B       | AY037282 | 2 391 | 1 617        | 93.4           | 106        |
| 3    | B       | AY835778 | 2 383 | 1 617        | 93.4           | 107        |
| 4    | B       | AF004394 | 2 379 | 1 617        | 93.4           | 107        |
| 5    | B       | M38429   | 2 367 | 1 617        | 93.3           | 109        |

**HIV-1 IN**

Consensus length : 867

| Rank | Subtype | AC       | Score | Match-length | Similarity [%] | Mismatches |
|------|---------|----------|-------|--------------|----------------|------------|
| 1    | B       | EF637046 | 1 513 | 867          | 97.0           | 26         |
| 2    | B       | U34604   | 1 513 | 867          | 97.0           | 26         |
| 3    | B       | ConsB-IN | 1 513 | 867          | 97.0           | 26         |
| 4    | B       | JQ316129 | 1 505 | 867          | 96.9           | 27         |
| 5    | B       | MH234640 | 1 505 | 867          | 96.9           | 27         |

**Detailed information**

|                                    |                                                                                                                                                                                                                                       |
|------------------------------------|---------------------------------------------------------------------------------------------------------------------------------------------------------------------------------------------------------------------------------------|
| <b>IDNS5 version</b>               | v3.13.0                                                                                                                                                                                                                               |
| <b>Drug resistance algorithm</b>   | ANRS (2022.33/sg/b)                                                                                                                                                                                                                   |
| <b>Pipeline name</b>               | HIV-1 PR+RT_frag+IN                                                                                                                                                                                                                   |
| <b>Pipeline version</b>            | 2.8.0_HIV1_v1.6                                                                                                                                                                                                                       |
| <b>Genotyping database version</b> | HIV1_r23u051                                                                                                                                                                                                                          |
| <b>Noise filter [%]</b>            | 0.5                                                                                                                                                                                                                                   |
| <b>Interpretation cutoff [%]</b>   | 20.0                                                                                                                                                                                                                                  |
| <b>Min. read depth [# reads]</b>   | 50                                                                                                                                                                                                                                    |
| <b>Number of input reads</b>       | 2 074 028                                                                                                                                                                                                                             |
| <b>Number of reads mapped</b>      | 1 131 366                                                                                                                                                                                                                             |
| <b>Mutations HIV-1 PR [(%)]</b>    | 3I (100.0), 10V (100.0), 11I (100.0), 13V (100.0), 16A (100.0), 24I (100.0), 33F (100.0), 37N (100.0), 46L (99.8), 54V (100.0), 60E (100.0), 62V (100.0), 63P (100.0), 71V (100.0), 72T (100.0), 73C (99.5), 82A (100.0), 84V (100.0) |

**Signature(s)**

Sample ID: CQ022022\_Miseq

Source ID: CQ022022\_Miseq

MID: n.a.

Subtype: B

**Mutations HIV-1 RT [(%)]**

35M (98.7), 39A (99.4), 41L (100.0), 65R (42.0), 67H (42.1), 67N (57.8), 69D (66.3), 69N (33.1), 70M (22.4), 74I (99.0), 75T (99.3), 123N (99.4), 135T (99.6), 138D (99.6), 177E (99.6), 178M (99.5), 181C (100.0), 211T (99.5), 214F (99.4), 215V (99.5), 218E (99.5), 219Q (99.4), 293V (99.4), 297A (99.3), 359S (99.1), 360T (99.2), 376A (97.0), 377V (92.3), 386I (32.8), 390R (99.6), 435A (100.0), 437V (100.0), 460D (100.0), 468S (99.3), 470P (100.0), 491P (100.0), 512K (100.0), 517I (100.0), 519S (100.0), 524E (99.4)

**Mutations HIV-1 IN [(%)]**

10E (100.0), 17N (100.0), 31I (100.0), 45G (99.5), 123S (100.0), 125V (99.8), 127K (100.0), 136N (100.0), 201I (100.0), 232D (100.0)

**Created by**

CH Versailles

**Signature(s)**

Sample ID: CQ032022\_Miseq

Source ID: CQ032022\_Miseq

MID: n.a.

Subtype: B

## Drug resistances

Drug resistance algorithm: ANRS (2022.33/sg/b)

### Nucleoside Reverse Transcriptase Inhibitors (NRTI)

| Drug    | Mutations list                           | Range | Color | Interpretation          |
|---------|------------------------------------------|-------|-------|-------------------------|
| 3TC_FTC |                                          | 1     |       | S - Susceptible         |
| ABC     | 41L (99.7%), 74V (99.2%), 215C (100.0%)  | 3     |       | R - Resistance          |
| ISL     |                                          | 1     |       | S - Susceptible         |
| TDF_TAF | 41L (99.7%), 74V (99.2%), 215C (100.0%)  | 2     |       | I - Possible resistance |
| ZDV     | 41L (99.7%), 215C (100.0%), 219E (99.2%) | 3     |       | R - Resistance          |

### Non-Nucleoside Reverse Transcriptase Inhibitors (NNRTI)

| Drug | Mutations list                          | Range | Color | Interpretation  |
|------|-----------------------------------------|-------|-------|-----------------|
| DOR  | 100I (99.1%), 103N (98.9%)              | 3     |       | R - Resistance  |
| EFV  | 100I (99.1%), 103N (98.9%)              | 3     |       | R - Resistance  |
| ETR  | 100I (99.1%)                            | 1     |       | S - Susceptible |
| NVP  | 98S (99.1%), 100I (99.1%), 103N (98.9%) | 3     |       | R - Resistance  |
| RPV  | 100I (99.1%), 103N (98.9%)              | 3     |       | R - Resistance  |

### Protease Inhibitors (PI)

| Drug        | Mutations list                                                                                  | Range | Color | Interpretation |
|-------------|-------------------------------------------------------------------------------------------------|-------|-------|----------------|
| ATV_RTV     | 10F (100.0%), 33F (100.0%), 71T (99.6%), 84V (100.0%), 90M (100.0%)                             | 3     |       | R - Resistance |
| DRV_RTV_BID | 32I (100.0%), 33F (100.0%), 54L (100.0%), 84V (100.0%), 89V (99.9%)                             | 3     |       | R - Resistance |
| DRV_RTV_QD  | 32I (100.0%), 33F (100.0%), 54L (100.0%), 84V (100.0%), 89V (99.9%)                             | 3     |       | R - Resistance |
| LPVr        | 10F (100.0%), 33F (100.0%), 54L (100.0%), 63P (100.0%), 71T (99.6%), 84V (100.0%), 90M (100.0%) | 3     |       | R - Resistance |

### Integrase Strand Transfer Inhibitors (INSTI)

| Drug    | Mutations list               | Range | Color | Interpretation          |
|---------|------------------------------|-------|-------|-------------------------|
| BIC     | 140S (100.0%), 148H (100.0%) | 3     |       | R - Resistance          |
| CAB     | 140S (100.0%), 148H (100.0%) | 3     |       | R - Resistance          |
| DTG_BID | 140S (100.0%), 148H (100.0%) | 2     |       | I - Possible resistance |
| DTG_QD  | 140S (100.0%), 148H (100.0%) | 3     |       | R - Resistance          |
| EVG     | 140S (100.0%), 148H (100.0%) | 3     |       | R - Resistance          |
| RAL     | 140S (100.0%), 148H (100.0%) | 3     |       | R - Resistance          |

## Auto-genotyping results

HIV-1 PR

Consensus length : 297

Signature(s)

Sample ID: CQ032022\_Miseq

Source ID: CQ032022\_Miseq

MID: n.a.

Subtype: B

| Rank | Subtype | AC       | Score | Match-length | Similarity [%] | Mismatches |
|------|---------|----------|-------|--------------|----------------|------------|
| 1    | D       | MN650444 | 405   | 297          | 91.6           | 25         |
| 2    | B       | KY658693 | 405   | 297          | 91.6           | 25         |
| 3    | B       | EF178358 | 405   | 297          | 91.6           | 25         |
| 4    | B       | GQ372066 | 399   | 297          | 91.2           | 26         |
| 5    | D       | MN650466 | 397   | 297          | 91.2           | 26         |

## HIV-1 RT

Consensus length : 1 440

| Rank | Subtype | AC       | Score | Match-length | Similarity [%] | Mismatches |
|------|---------|----------|-------|--------------|----------------|------------|
| 1    | B       | AY835769 | 2 312 | 1 440        | 95.2           | 69         |
| 2    | B       | M38429   | 2 289 | 1 440        | 95.0           | 72         |
| 3    | B       | MH234640 | 2 265 | 1 440        | 94.8           | 75         |
| 4    | B       | U43096   | 2 265 | 1 440        | 94.8           | 75         |
| 5    | B       | KJ140264 | 2 257 | 1 440        | 94.7           | 76         |

## HIV-1 IN

Consensus length : 867

| Rank | Subtype | AC       | Score | Match-length | Similarity [%] | Mismatches |
|------|---------|----------|-------|--------------|----------------|------------|
| 1    | B       | ConsB-IN | 1 481 | 867          | 96.5           | 30         |
| 2    | B       | KX505396 | 1 457 | 867          | 96.2           | 33         |
| 3    | B       | MW405324 | 1 449 | 867          | 96.1           | 34         |
| 4    | B       | OK181205 | 1 449 | 867          | 96.1           | 34         |
| 5    | B       | KY514083 | 1 449 | 867          | 96.1           | 34         |

## Detailed information

|                             |                                                                                                                                                                                                                                                           |
|-----------------------------|-----------------------------------------------------------------------------------------------------------------------------------------------------------------------------------------------------------------------------------------------------------|
| IDNS5 version               | v3.13.0                                                                                                                                                                                                                                                   |
| Drug resistance algorithm   | ANRS (2022.33/sg/b)                                                                                                                                                                                                                                       |
| Pipeline name               | HIV-1 PR+RT_frag+IN                                                                                                                                                                                                                                       |
| Pipeline version            | 2.8.0_HIV1_v1.6                                                                                                                                                                                                                                           |
| Genotyping database version | HIV1_r23u051                                                                                                                                                                                                                                              |
| Noise filter [%]            | 0.5                                                                                                                                                                                                                                                       |
| Interpretation cutoff [%]   | 20.0                                                                                                                                                                                                                                                      |
| Min. read depth [# reads]   | 50                                                                                                                                                                                                                                                        |
| Number of input reads       | 2 031 110                                                                                                                                                                                                                                                 |
| Number of reads mapped      | 1 003 129                                                                                                                                                                                                                                                 |
| Mutations HIV-1 PR [(%)]    | 3I (100.0), 10F (100.0), 13V (100.0), 32I (100.0), 33F (100.0), 35D (89.9), 36I (100.0), 37N (100.0), 43Q (35.3), 43T (64.3), 45R (32.6), 54L (100.0), 63P (100.0), 64V (99.0), 71T (99.6), 72V (100.0), 73T (99.0), 84V (100.0), 89V (99.9), 90M (100.0) |

## Signature(s)



Sample ID: CQ032022\_Miseq

Source ID: CQ032022\_Miseq

MID: n.a.

Subtype: B

**Mutations HIV-1 RT [(%)]**

6K (99.5), 39K (37.6), 41L (99.7), 67G (98.7), 68G (99.0), 74V (99.2), 98S (99.1), 100I (99.1), 103N (98.9), 108I (99.0), 135T (99.4), 177N (98.9), 200I (99.2), 214F (99.4), 215C (100.0), 219E (99.2), 228H (99.4), 272A (99.1), 277K (98.9), 286A (99.2), 297K (99.1), 356K

**Mutations HIV-1 IN [(%)]**

(99.1), 376A (81.4), 390R (93.4), 458I (98.6), 461T (98.5), 463K (84.4), 468S (100.0), 10E (100.0), 20K (100.0), 31I (100.0), 72I (99.5), 101I (100.0), 112M (100.0), 123S (100.0), 124N (100.0), 125V (100.0), 127K (100.0), 140S (100.0), 148H (100.0), 163E (99.5), 207N (100.0), 211T (99.3), 218S (98.5), 232D (100.0), 256E (100.0)

**Created by**

CH Versailles

**Signature(s)**

Sample ID: CQ012023\_Miseq

Source ID: CQ012023\_Miseq

MID: n.a.

Subtype: B

## Drug resistances

Drug resistance algorithm: ANRS (2022.33/sg/b)

### Nucleoside Reverse Transcriptase Inhibitors (NRTI)

| Drug    | Mutations list                            | Range | Color | Interpretation  |
|---------|-------------------------------------------|-------|-------|-----------------|
| 3TC_FTC | 184V (99.6%)                              | 3     |       | R - Resistance  |
| ABC     | 74I (100.0%), 184V (99.6%), 215V (100.0%) | 3     |       | R - Resistance  |
| ISL     | 184V (99.6%)                              | 3     |       | R - Resistance  |
| TDF_TAF | 74I (100.0%), 215V (100.0%)               | 1     |       | S - Susceptible |
| ZDV     | 215V (100.0%), 219E (99.6%)               | 3     |       | R - Resistance  |

### Non-Nucleoside Reverse Transcriptase Inhibitors (NNRTI)

| Drug | Mutations list             | Range | Color | Interpretation          |
|------|----------------------------|-------|-------|-------------------------|
| DOR  | 103N (99.3%)               | 1     |       | S - Susceptible         |
| EFV  | 103N (99.3%)               | 3     |       | R - Resistance          |
| ETR  | 138G (99.6%)               | 2     |       | I - Possible resistance |
| NVP  | 103N (99.3%)               | 3     |       | R - Resistance          |
| RPV  | 103N (99.3%), 138G (99.6%) | 3     |       | R - Resistance          |

### Protease Inhibitors (PI)

| Drug        | Mutations list                                                                                | Range | Color | Interpretation |
|-------------|-----------------------------------------------------------------------------------------------|-------|-------|----------------|
| ATV_RTV     | 10V (99.2%), 33F (99.2%), 60E (100.0%), 71V (100.0%), 84V (100.0%), 90M (100.0%)              | 3     |       | R - Resistance |
| DRV_RTV_BID | 32I (100.0%), 33F (99.2%), 54L (99.3%), 84V (100.0%), 89V (99.8%)                             | 3     |       | R - Resistance |
| DRV_RTV_QD  | 32I (100.0%), 33F (99.2%), 54L (99.3%), 84V (100.0%), 89V (99.8%)                             | 3     |       | R - Resistance |
| LPVr        | 10V (99.2%), 33F (99.2%), 54L (99.3%), 63P (100.0%), 71V (100.0%), 84V (100.0%), 90M (100.0%) | 3     |       | R - Resistance |

### Integrase Strand Transfer Inhibitors (INSTI)

| Drug    | Mutations list                           | Range | Color | Interpretation  |
|---------|------------------------------------------|-------|-------|-----------------|
| BIC     |                                          | 1     |       | S - Susceptible |
| CAB     |                                          | 1     |       | S - Susceptible |
| DTG_BID | 97A (99.3%)                              | 1     |       | S - Susceptible |
| DTG_QD  |                                          | 1     |       | S - Susceptible |
| EVG     | 97A (99.3%), 143R (96.6%), 157Q (100.0%) | 3     |       | R - Resistance  |
| RAL     | 143R (96.6%), 157Q (100.0%)              | 3     |       | R - Resistance  |

## Auto-genotyping results

HIV-1 PR

Consensus length : 297

| Rank | Subtype | AC | Score | Match-length | Similarity [%] | Mismatches |
|------|---------|----|-------|--------------|----------------|------------|
|------|---------|----|-------|--------------|----------------|------------|

Signature(s)

Sample ID: CQ012023\_Miseq

Source ID: CQ012023\_Miseq

MID: n.a.

Subtype: B

|   |   |          |     |     |      |    |
|---|---|----------|-----|-----|------|----|
| 1 | B | AB874132 | 367 | 297 | 90.6 | 28 |
| 2 | B | KY658703 | 359 | 297 | 90.2 | 29 |
| 3 | D | AF484480 | 359 | 297 | 90.2 | 29 |
| 4 | B | EU839606 | 359 | 297 | 90.2 | 29 |
| 5 | B | MW059247 | 351 | 297 | 89.9 | 30 |

## HIV-1 RT

IDNS5 version v3.13.0  
Drug resistance algorithm ANRS (2022.33/sg/b)  
Pipeline name HIV-1 PR+RT\_frag+IN  
Pipeline version 2.8.0\_HIV1\_v1.6  
Genotyping database version HIV1\_r23u051  
Noise filter [%] 0.5  
Interpretation cutoff [%] 20.0  
Min. read depth [# reads] 50  
Number of input reads 2 032 146  
Number of reads mapped 1 059 312  
Mutations HIV-1 PR [(%)  
3I (100.0), 10V (99.2), 11L (100.0), 13V (100.0), 14R (100.0), 15V (100.0), 20T (100.0),  
32I (100.0), 33F (99.2), 35D (97.7), 36I (100.0), 37N (100.0), 41K (100.0), 54L (99.3),  
58E (98.5), 60E (100.0), 61E (100.0), 62V (100.0), 63P (100.0), 71V (100.0), 73N (99.4),  
84V

Signature(s)

Sample ID: CQ012023\_Miseq

Source ID: CQ012023\_Miseq

MID: n.a.

Subtype: B

(100.0), 89V (99.8), 90M (100.0)

Consensus length : 1 476

| Rank | Subtype | AC       | Score | Match-length | Similarity [%] | Mismatches |
|------|---------|----------|-------|--------------|----------------|------------|
| 1    | B       | AF538303 | 2 114 | 1 476        | 93.0           | 103        |
| 2    | B       | M17451   | 2 106 | 1 476        | 93.0           | 104        |
| 3    | B       | JF689873 | 2 098 | 1 476        | 92.9           | 105        |
| 4    | B       | AF004394 | 2 098 | 1 476        | 92.9           | 105        |
| 5    | B       | AY835769 | 2 074 | 1 476        | 92.7           | 108        |

HIV-1 IN

Consensus length : 867

| Rank | Subtype | AC       | Score | Match-length | Similarity [%] | Mismatches |
|------|---------|----------|-------|--------------|----------------|------------|
| 1    | B       | M17451   | 1 441 | 863          | 96.1           | 34         |
| 2    | B       | ConsB-IN | 1 413 | 861          | 95.7           | 37         |
| 3    | B       | MW924814 | 1 382 | 861          | 95.2           | 41         |
| 4    | B       | AY173955 | 1 378 | 863          | 95.1           | 42         |
| 5    | B       | MW059483 | 1 374 | 861          | 95.1           | 42         |

## Detailed information

## Mutations HIV-1 RT [(%)]

35T (99.1), 62V (98.6), 67G (100.0), 68G (99.6), 74I (100.0), 75T (99.8), 103N (99.3), 135V (99.1), 138G (99.6), 162Y (99.8), 173R (97.0), 174K (99.4), 184V (99.6), 194D (94.6), 207A (99.8), 211K (99.4), 214F (100.0), 215V (100.0), 219E (99.6), 232H (99.6), 238T (99.5), 250N (95.7), 277K (99.5), 293V (97.1), 297A (99.6), 333D (99.3), 335C (99.5), 356K (99.4), 357L (99.2), 360T (98.9), 376A (99.0), 379C (21.0), 390R (98.0), 399D (98.8), 405H (98.7), 435I (98.9), 460D (98.8), 468S (100.0), 470N (99.2), 491S (100.0)

## Mutations HIV-1 IN [(%)]

6E (100.0), 31I (100.0), 72I (100.0), 97A (99.3), 101I (100.0), 111T (99.6), 112V (100.0), 119T (100.0), 123S (100.0), 124N (100.0), 127K (100.0), 142A (94.9), 143R (96.6), 157Q (100.0), 160Q (99.5), 167E (100.0), 218S (98.2), 220M (100.0), 227F (100.0), 230N (99.6), 232D (100.0), 283G (100.0)

## Created by

CH Versailles

Signature(s)

Sample ID: CQ022023\_Miseq

Source ID: CQ022023\_Miseq

MID: n.a.

Subtype: A1

## Drug resistances

Drug resistance algorithm: ANRS (2022.33/sg/b)

### Nucleoside Reverse Transcriptase Inhibitors (NRTI)

| Drug    | Mutations list | Range | Color | Interpretation  |
|---------|----------------|-------|-------|-----------------|
| 3TC_FTC |                | 1     |       | S - Susceptible |
| ABC     |                | 1     |       | S - Susceptible |
| ISL     |                | 1     |       | S - Susceptible |
| TDF_TAF |                | 1     |       | S - Susceptible |
| ZDV     |                | 1     |       | S - Susceptible |

### Non-Nucleoside Reverse Transcriptase Inhibitors (NNRTI)

| Drug | Mutations list | Range | Color | Interpretation  |
|------|----------------|-------|-------|-----------------|
| DOR  | 103N (99.3%)   | 1     |       | S - Susceptible |
| EFV  | 103N (99.3%)   | 3     |       | R - Resistance  |
| ETR  |                | 1     |       | S - Susceptible |
| NVP  | 103N (99.3%)   | 3     |       | R - Resistance  |
| RPV  | 103N (99.3%)   | 1     |       | S - Susceptible |

### Protease Inhibitors (PI)

| Drug        | Mutations list | Range | Color | Interpretation  |
|-------------|----------------|-------|-------|-----------------|
| ATV_RTV     |                | 1     |       | S - Susceptible |
| DRV_RTV_BID | 11I (99.3%)    | 1     |       | S - Susceptible |
| DRV_RTV_QD  | 11I (99.3%)    | 1     |       | S - Susceptible |
| LPVr        |                | 1     |       | S - Susceptible |

### Integrase Strand Transfer Inhibitors (INSTI)

| Drug    | Mutations list | Range | Color | Interpretation  |
|---------|----------------|-------|-------|-----------------|
| BIC     | 74I (100.0%)   | 1     |       | S - Susceptible |
| CAB     | 74I (100.0%)   | 1     |       | S - Susceptible |
| DTG_BID | 74I (100.0%)   | 1     |       | S - Susceptible |
| DTG_QD  | 74I (100.0%)   | 1     |       | S - Susceptible |
| EVG     | 74I (100.0%)   | 1     |       | S - Susceptible |
| RAL     | 74I (100.0%)   | 1     |       | S - Susceptible |

## Auto-genotyping results

HIV-1 PR

Consensus length : 297

Signature(s)

Sample ID: CQ022023\_Miseq

Source ID: CQ022023\_Miseq

MID: n.a.

Subtype: A1

| Rank | Subtype  | AC       | Score | Match-length | Similarity [%] | Mismatches |
|------|----------|----------|-------|--------------|----------------|------------|
| 1    | A        | MH705157 | 484   | 296          | 95.6           | 13         |
| 2    | A1       | AB485632 | 476   | 296          | 95.3           | 14         |
| 3    | CRF02_AG | AY371146 | 476   | 296          | 95.3           | 14         |
| 4    | A7       | MH078558 | 468   | 296          | 94.9           | 15         |
| 5    | CRF01_AE | JX448296 | 468   | 296          | 94.9           | 15         |

**HIV-1 RT**

Consensus length : 1 617

| Rank | Subtype   | AC       | Score | Match-length | Similarity [%] | Mismatches |
|------|-----------|----------|-------|--------------|----------------|------------|
| 1    | A1        | M62320   | 2 190 | 1 613        | 91.9           | 130        |
| 2    | A1        | AB485632 | 2 178 | 1 617        | 91.7           | 134        |
| 3    | CRF09_cpx | AY093607 | 2 174 | 1 617        | 91.7           | 134        |
| 4    | A1        | MH705153 | 2 166 | 1 617        | 91.7           | 134        |
| 5    | A3        | AY521631 | 2 150 | 1 617        | 91.5           | 137        |

**HIV-1 IN**

Consensus length : 864

| Rank | Subtype   | AC       | Score | Match-length | Similarity [%] | Mismatches |
|------|-----------|----------|-------|--------------|----------------|------------|
| 1    | A3        | AY521629 | 1 411 | 864          | 95.6           | 38         |
| 2    | AKU       | DQ886038 | 1 411 | 864          | 95.6           | 38         |
| 3    | CRF45_cpx | FN392874 | 1 396 | 864          | 95.2           | 41         |
| 4    | A6        | MN703137 | 1 394 | 864          | 95.2           | 41         |
| 5    | CRF45_cpx | FN392877 | 1 392 | 860          | 95.3           | 40         |

**Detailed information**

|                                    |                                                                                                                                           |
|------------------------------------|-------------------------------------------------------------------------------------------------------------------------------------------|
| <b>IDNS5 version</b>               | v3.13.0                                                                                                                                   |
| <b>Drug resistance algorithm</b>   | ANRS (2022.33/sg/b)                                                                                                                       |
| <b>Pipeline name</b>               | HIV-1 PR+RT_frag+IN                                                                                                                       |
| <b>Pipeline version</b>            | 2.8.0_HIV1_v1.6                                                                                                                           |
| <b>Genotyping database version</b> | HIV1_r23u051                                                                                                                              |
| <b>Noise filter [%]</b>            | 0.5                                                                                                                                       |
| <b>Interpretation cutoff [%]</b>   | 20.0                                                                                                                                      |
| <b>Min. read depth [# reads]</b>   | 50                                                                                                                                        |
| <b>Number of input reads</b>       | 1 675 712                                                                                                                                 |
| <b>Number of reads mapped</b>      | 630 450                                                                                                                                   |
| <b>Mutations HIV-1 PR [(%)]</b>    | 3I (100.0), 10M (100.0), 11I (99.3), 13V (100.0), 20I (100.0), 35D (99.6), 36I (100.0), 37N (100.0), 41K (99.5), 69K (100.0), 89M (100.0) |

Signature(s)

Sample ID: CQ022023\_Miseq

Source ID: CQ022023\_Miseq

MID: n.a.

Subtype: A1

**Mutations HIV-1 RT [(%)]**

6K (100.0), 11T (99.6), 28A (99.2), 35T (100.0), 39E (99.3), 103N (99.3), 123S (98.0), 135T (99.5), 173A (99.2), 174K (98.6), 177E (99.5), 196E (99.2), 203A (99.4), 207E (100.0), 211K (99.2), 245Q (99.4), 248D (99.3), 250E (99.5), 277K (99.1), 286A (99.3), 292I (99.1), 293V (99.3), 297R (98.5), 326V (98.4), 335D (99.1), 356K (99.1), 357K (99.4), 359S (98.6), 369A (98.6), 371V (97.9), 375R (39.6), 375V (54.6), 376V (52.4), 376H (41.2), 377Q (40.4), 377L (50.6), 395R (99.3), 403V (99.5), 432D (99.3), 435A (100.0), 458I (98.0), 460D (98.8), 461K (99.4), 468S (97.6), 471E (100.0), 480H (99.4), 512K (98.1), 519S (100.0), 524K (97.6), 527E (83.5), 530R (100.0), 534S (99.1)

**Mutations HIV-1 IN [(%)]**

10E (100.0), 11D (100.0), 24N (100.0), 42R (99.6), 63I (100.0), 72I (100.0), 74I (100.0), 112I (100.0), 113V (99.7), 123S (100.0), 124N (100.0), 125A (100.0), 127K (100.0), 134D (99.7), 167E (100.0), 201I (100.0), 206S (99.6), 232D (100.0), 234I (100.0), 255T (100.0), 283G (100.0)

**Created by**

CH Versailles

**Signature(s)**

Sample ID: CQ042023\_Miseq

Source ID: CQ042023\_Miseq

MID: n.a.

Subtype: B

## Drug resistances

Drug resistance algorithm: ANRS (2022.33/sg/b)

### Nucleoside Reverse Transcriptase Inhibitors (NRTI)

| Drug    | Mutations list                                         | Range | Color | Interpretation          |
|---------|--------------------------------------------------------|-------|-------|-------------------------|
| 3TC_FTC |                                                        | 1     |       | S - Susceptible         |
| ABC     | 41L (100.0%), 215F (100.0%)                            | 2     |       | I - Possible resistance |
| ISL     |                                                        | 1     |       | S - Susceptible         |
| TDF_TAF | 41L (100.0%), 215F (100.0%)                            | 1     |       | S - Susceptible         |
| ZDV     | 41L (100.0%), 70R (93.9%), 215F (100.0%), 219E (99.5%) | 3     |       | R - Resistance          |

### Non-Nucleoside Reverse Transcriptase Inhibitors (NNRTI)

| Drug | Mutations list             | Range | Color | Interpretation          |
|------|----------------------------|-------|-------|-------------------------|
| DOR  | 98G (98.1%), 181C (100.0%) | 2     |       | I - Possible resistance |
| EFV  | 181C (100.0%)              | 3     |       | R - Resistance          |
| ETR  | 98G (98.1%), 181C (100.0%) | 3     |       | R - Resistance          |
| NVP  | 181C (100.0%)              | 3     |       | R - Resistance          |
| RPV  | 98G (98.1%), 181C (100.0%) | 3     |       | R - Resistance          |

### Protease Inhibitors (PI)

| Drug        | Mutations list                                                                     | Range | Color | Interpretation  |
|-------------|------------------------------------------------------------------------------------|-------|-------|-----------------|
| ATV_RTV     | 10I (100.0%), 71V (100.0%), 90M (100.0%)                                           | 3     |       | R - Resistance  |
| DRV_RTV_BID |                                                                                    | 1     |       | S - Susceptible |
| DRV_RTV_QD  |                                                                                    | 1     |       | S - Susceptible |
| LPVr        | 10I (100.0%), 54V (100.0%), 63P (100.0%), 71V (100.0%), 82A (100.0%), 90M (100.0%) | 3     |       | R - Resistance  |

### Integrase Strand Transfer Inhibitors (INSTI)

| Drug    | Mutations list | Range | Color | Interpretation  |
|---------|----------------|-------|-------|-----------------|
| BIC     |                | 1     |       | S - Susceptible |
| CAB     |                | 1     |       | S - Susceptible |
| DTG_BID |                | 1     |       | S - Susceptible |
| DTG_QD  |                | 1     |       | S - Susceptible |
| EVG     |                | 1     |       | S - Susceptible |
| RAL     |                | 1     |       | S - Susceptible |

## Auto-genotyping results

HIV-1 PR

Consensus length : 297

Signature(s)



Sample ID: CQ042023\_Miseq

Source ID: CQ042023\_Miseq

MID: n.a.

Subtype: B

| Rank | Subtype | AC       | Score | Match-length | Similarity [%] | Mismatches |
|------|---------|----------|-------|--------------|----------------|------------|
| 1    | B       | AB873943 | 462   | 293          | 94.9           | 15         |
| 2    | B       | FJ469753 | 462   | 293          | 94.9           | 15         |
| 3    | B       | OK181187 | 454   | 293          | 94.5           | 16         |
| 4    | BD      | MH234642 | 454   | 293          | 94.5           | 16         |
| 5    | B       | KY112061 | 454   | 293          | 94.5           | 16         |

**HIV-1 RT**

Consensus length : 1 410

| Rank | Subtype | AC       | Score | Match-length | Similarity [%] | Mismatches |
|------|---------|----------|-------|--------------|----------------|------------|
| 1    | B       | AF538307 | 2 242 | 1 413        | 95.0           | 67         |
| 2    | B       | AY835778 | 2 236 | 1 394        | 95.3           | 63         |
| 3    | B       | K03455   | 2 236 | 1 394        | 95.3           | 63         |
| 4    | B       | AF538303 | 2 234 | 1 413        | 95.0           | 68         |
| 5    | B       | FJ469685 | 2 226 | 1 413        | 94.9           | 69         |

**HIV-1 IN**

Consensus length : 867

| Rank | Subtype | AC       | Score | Match-length | Similarity [%] | Mismatches |
|------|---------|----------|-------|--------------|----------------|------------|
| 1    | B       | ConsB-IN | 1 497 | 867          | 96.8           | 28         |
| 2    | B       | D10112   | 1 473 | 867          | 96.4           | 31         |
| 3    | B       | AB564745 | 1 473 | 867          | 96.4           | 31         |
| 4    | B       | AY173960 | 1 473 | 867          | 96.4           | 31         |
| 5    | B       | GQ371811 | 1 467 | 867          | 96.3           | 32         |

**Detailed information**

|                                    |                                                                                                                                                                                   |
|------------------------------------|-----------------------------------------------------------------------------------------------------------------------------------------------------------------------------------|
| <b>IDNS5 version</b>               | v3.13.0                                                                                                                                                                           |
| <b>Drug resistance algorithm</b>   | ANRS (2022.33/sg/b)                                                                                                                                                               |
| <b>Pipeline name</b>               | HIV-1 PR+RT_frag+IN                                                                                                                                                               |
| <b>Pipeline version</b>            | 2.8.0_HIV1_v1.6                                                                                                                                                                   |
| <b>Genotyping database version</b> | HIV1_r23u051                                                                                                                                                                      |
| <b>Noise filter [%]</b>            | 0.5                                                                                                                                                                               |
| <b>Interpretation cutoff [%]</b>   | 20.0                                                                                                                                                                              |
| <b>Min. read depth [# reads]</b>   | 50                                                                                                                                                                                |
| <b>Number of input reads</b>       | 642 162                                                                                                                                                                           |
| <b>Number of reads mapped</b>      | 331 310                                                                                                                                                                           |
| <b>Mutations HIV-1 PR [(%)]</b>    | 3I (100.0), 10I (100.0), 15V (100.0), 35D (98.6), 36I (100.0), 37N (100.0), 41K (100.0), 54V (100.0), 62V (100.0), 63P (100.0), 71V (100.0), 73S (98.2), 82A (100.0), 90M (100.0) |

**Signature(s)**

Sample ID: CQ042023\_Miseq

Source ID: CQ042023\_Miseq

MID: n.a.

Subtype: B

**Mutations HIV-1 RT [(%)]**

4T (100.0), 36D (99.6), 41L (100.0), 43E (97.2), 67- (86.7), 69G (99.9), 70R (93.9), 98G (98.1), 108I (99.5), 122K (99.6), 123E (100.0), 135T (100.0), 178M (99.5), 181C (100.0), 211K (99.4), 214F (98.6), 215F (100.0), 219E (99.5), 277K (99.4), 293V (100.0), 334H (99.7), 356K (98.7), 359S (99.3), 360T (99.5), 376A (99.1), 400A (100.0), 460D (98.4), 466I (100.0), 467I (100.0), 468S (98.2), 470N (100.0)

**Mutations HIV-1 IN [(%)]**

10E (100.0), 17N (100.0), 28I (99.8), 30A (100.0), 39C (100.0), 112V (99.9), 119P (100.0), 123S (100.0), 124T (99.2), 127K (100.0), 201I (100.0), 232D (100.0), 234I (100.0), 253E (100.0), 286N (99.3)

**Created by**

CH Versailles

**Signature(s)**
