# Supplementary material for: Optimization of HIV Sequencing Method Using Vela Sentosa Library on Miseq Ilumina Platform
Source: Preprints.org preprint supplement (doi:10.20944/preprints202401.1643.v1), 2024-01-23
Supplement: Supplementary file 2 [file supplementary]

Sample ID: CQ012022\_PGM

Source ID: CQ012022\_PGM

MID: n.a.

Subtype: F2

## Drug resistances

Drug resistance algorithm: ANRS (2022.33/sg/b)

### Nucleoside Reverse Transcriptase Inhibitors (NRTI)

| Drug    | Mutations list                                                     | Range | Color | Interpretation  |
|---------|--------------------------------------------------------------------|-------|-------|-----------------|
| 3TC_FTC |                                                                    | 1     | Green | S - Susceptible |
| ABC     | 41L (100.0%), 67N (98.4%), 74V (99.2%), 215F (98.4%)               | 3     | Red   | R - Resistance  |
| ISL     |                                                                    | 1     | Green | S - Susceptible |
| TDF_TAF | 41L (100.0%), 67N (98.4%), 69D (98.8%), 74V (99.2%), 215F (98.4%)  | 3     | Red   | R - Resistance  |
| ZDV     | 41L (100.0%), 67N (98.4%), 70R (99.1%), 215F (98.4%), 219Q (95.6%) | 3     | Red   | R - Resistance  |

### Non-Nucleoside Reverse Transcriptase Inhibitors (NNRTI)

| Drug | Mutations list               | Range | Color  | Interpretation          |
|------|------------------------------|-------|--------|-------------------------|
| DOR  | 181C (100.0%), 190A (100.0%) | 2     | Yellow | I - Possible resistance |
| EFV  | 181C (100.0%), 190A (100.0%) | 3     | Red    | R - Resistance          |
| ETR  | 181C (100.0%), 190A (100.0%) | 3     | Red    | R - Resistance          |
| NVP  | 181C (100.0%), 190A (100.0%) | 3     | Red    | R - Resistance          |
| RPV  | 181C (100.0%)                | 3     | Red    | R - Resistance          |

### Protease Inhibitors (PI)

| Drug        | Mutations list                                                                     | Range | Color | Interpretation  |
|-------------|------------------------------------------------------------------------------------|-------|-------|-----------------|
| ATV_RTV     | 10V (100.0%), 16E (99.7%), 33F (100.0%), 90M (100.0%)                              | 3     | Red   | R - Resistance  |
| DRV_RTV_BID | 33F (100.0%)                                                                       | 1     | Green | S - Susceptible |
| DRV_RTV_QD  | 33F (100.0%)                                                                       | 1     | Green | S - Susceptible |
| LPVr        | 10V (100.0%), 33F (100.0%), 53L (100.0%), 54V (100.0%), 82F (100.0%), 90M (100.0%) | 3     | Red   | R - Resistance  |

### Integrase Strand Transfer Inhibitors (INSTI)

| Drug    | Mutations list | Range | Color | Interpretation  |
|---------|----------------|-------|-------|-----------------|
| BIC     |                | 1     | Green | S - Susceptible |
| CAB     |                | 1     | Green | S - Susceptible |
| DTG_BID |                | 1     | Green | S - Susceptible |
| DTG_QD  |                | 1     | Green | S - Susceptible |
| EVG     |                | 1     | Green | S - Susceptible |
| RAL     |                | 1     | Green | S - Susceptible |

## Auto-genotyping results

### HIV-1 PR

Consensus length : 297

| Rank | Subtype | AC | Score | Match-length | Similarity [%] | Mismatches |
|------|---------|----|-------|--------------|----------------|------------|
|------|---------|----|-------|--------------|----------------|------------|

Signature(s)

Sample ID: CQ012022\_PGM

Source ID: CQ012022\_PGM

MID: n.a.

Subtype: F2

|   |    |          |     |     |      |    |
|---|----|----------|-----|-----|------|----|
| 1 | F1 | FJ900268 | 365 | 296 | 90.5 | 28 |
| 2 | F1 | DQ979024 | 365 | 296 | 90.5 | 28 |
| 3 | F1 | DQ979025 | 357 | 296 | 90.2 | 29 |
| 4 | F1 | FJ900266 | 333 | 296 | 89.2 | 32 |
| 5 | F1 | FJ900267 | 333 | 296 | 89.2 | 32 |

**HIV-1 RT**

Consensus length : 1 620

| Rank | Subtype   | AC       | Score | Match-length | Similarity [%] | Mismatches |
|------|-----------|----------|-------|--------------|----------------|------------|
| 1    | F2        | AJ249236 | 1 984 | 1 617        | 90.6           | 150        |
| 2    | F2        | MN153483 | 1 966 | 1 616        | 90.3           | 156        |
| 3    | F2        | KU749420 | 1 966 | 1 616        | 90.3           | 156        |
| 4    | CRF46_BF1 | MG365771 | 1 961 | 1 621        | 90.4           | 154        |
| 5    | F1        | FJ771008 | 1 943 | 1 620        | 90.1           | 160        |

**HIV-1 IN**

Consensus length : 864

| Rank | Subtype | AC       | Score | Match-length | Similarity [%] | Mismatches |
|------|---------|----------|-------|--------------|----------------|------------|
| 1    | F2      | MN153485 | 1 302 | 861          | 94.1           | 51         |
| 2    | D       | AF484497 | 1 302 | 849          | 94.3           | 48         |
| 3    | A4      | AM000054 | 1 302 | 861          | 94.1           | 51         |
| 4    | F2      | AJ249236 | 1 287 | 861          | 93.8           | 53         |
| 5    | F1      | FJ900267 | 1 287 | 861          | 93.8           | 53         |

**Detailed information**

|                                    |                                                                                                                                                                                                                                                                                                   |
|------------------------------------|---------------------------------------------------------------------------------------------------------------------------------------------------------------------------------------------------------------------------------------------------------------------------------------------------|
| <b>IDNS5 version</b>               | v3.13.0                                                                                                                                                                                                                                                                                           |
| <b>Drug resistance algorithm</b>   | ANRS (2022.33/sg/b)                                                                                                                                                                                                                                                                               |
| <b>Pipeline name</b>               | HIV-1 PR+RT_frag+IN                                                                                                                                                                                                                                                                               |
| <b>Pipeline version</b>            | 2.4.6_HIV1_v1.6                                                                                                                                                                                                                                                                                   |
| <b>Genotyping database version</b> | HIV1_r23u051                                                                                                                                                                                                                                                                                      |
| <b>Noise filter [%]</b>            | 0.5                                                                                                                                                                                                                                                                                               |
| <b>Interpretation cutoff [%]</b>   | 20.0                                                                                                                                                                                                                                                                                              |
| <b>Min. read depth [# reads]</b>   | 50                                                                                                                                                                                                                                                                                                |
| <b>Number of input reads</b>       | 752 343                                                                                                                                                                                                                                                                                           |
| <b>Number of reads mapped</b>      | 680 565                                                                                                                                                                                                                                                                                           |
| <b>Mutations HIV-1 PR [(%)]</b>    | 3I (100.0), 10V (100.0), 12I (98.0), 13V (100.0), 15V (100.0), 16E (99.7), 20V (98.2), 33F (100.0), 35N (96.9), 36I (100.0), 37N (100.0), 39Q (100.0), 41K (97.9), 45V (100.0), 53L (100.0), 54V (100.0), 57K (94.1), 62V (100.0), 63T (100.0), 74A (100.0), 82F (100.0), 89M (85.8), 90M (100.0) |

**Signature(s)**

Sample ID: CQ012022\_PGM

Source ID: CQ012022\_PGM

MID: n.a.

Subtype: F2

**Mutations HIV-1 RT [(%)]**

20R (100.0), 35T (100.0), 39M (100.0), 41L (100.0), 67N (98.4), 69D (98.8), 70R (99.1), 74V (99.2), 75T (100.0), 101Q (98.3), 118I (100.0), 171Y (100.0), 173T (98.3), 174K (94.8), 177E (100.0), 178L (100.0), 181C (100.0), 190A (100.0), 203K (100.0), 207E (100.0), 208Y (100.0), 211A (100.0), 215F (98.4), 219Q (95.6), 223Q (100.0), 228H (99.6), 245Q (100.0), 248D (100.0), 250E (100.0), 277K (100.0), 283I (100.0), 286A (100.0), 291D (100.0), 292I (100.0), 293V (100.0), 297Q (99.4), 324E (100.0), 333D (100.0), 334H (100.0), 356K (89.9), 359S (100.0), 365I (100.0), 376C (100.0), 386I (93.4), 390R (100.0), 399G (100.0), 411L (100.0), 431T (100.0), 449Q (99.5), 451R (100.0), 452E (100.0), 460D (99.5), 466A (100.0), 468S (100.0), 483H (98.9), 491S (100.0), 512K (95.4), 527Q (99.5), 534S (100.0)

**Mutations HIV-1 IN [(%)]**

3E (100.0), 7R (100.0), 10E (100.0), 17N (100.0), 100Y (100.0), 101I (100.0), 112V (100.0), 119P (100.0), 123S (100.0), 125A (100.0), 127K (100.0), 136Q (100.0), 205S (100.0), 218I (99.2), 232D (100.0), 234I (100.0), 255N (100.0), 256E (100.0), 283G (100.0), 288N (94.3)

**Created by**

CH Versailles

**Signature(s)**

Sample ID: CQ022022\_PGM

Source ID: CQ022022\_PGM

MID: n.a.

Subtype: B

## Drug resistances

Drug resistance algorithm: ANRS (2022.33/sg/b)

### Nucleoside Reverse Transcriptase Inhibitors (NRTI)

| Drug    | Mutations list                                                                              | Range | Color | Interpretation  |
|---------|---------------------------------------------------------------------------------------------|-------|-------|-----------------|
| 3TC_FTC | 65R (31.7%)                                                                                 | 3     |       | R - Resistance  |
| ABC     | 41L (100.0%), 65R (31.7%), 67N (66.6%), 74I (93.4%), 215V (96.8%)                           | 3     |       | R - Resistance  |
| ISL     |                                                                                             | 1     |       | S - Susceptible |
| TDF_TAF | 41L (100.0%), 65R (31.7%), 67N (66.6%), 69D (67.6%), 69N (32.4%), 74I (93.4%), 215V (96.8%) | 3     |       | R - Resistance  |
| ZDV     | 41L (100.0%), 67N (66.6%), 215V (96.8%), 219Q (100.0%)                                      | 3     |       | R - Resistance  |

### Non-Nucleoside Reverse Transcriptase Inhibitors (NNRTI)

| Drug | Mutations list | Range | Color | Interpretation  |
|------|----------------|-------|-------|-----------------|
| DOR  | 181C (100.0%)  | 1     |       | S - Susceptible |
| EFV  | 181C (100.0%)  | 3     |       | R - Resistance  |
| ETR  | 181C (100.0%)  | 3     |       | R - Resistance  |
| NVP  | 181C (100.0%)  | 3     |       | R - Resistance  |
| RPV  | 181C (100.0%)  | 3     |       | R - Resistance  |

### Protease Inhibitors (PI)

| Drug        | Mutations list                                                                                                            | Range | Color | Interpretation          |
|-------------|---------------------------------------------------------------------------------------------------------------------------|-------|-------|-------------------------|
| ATV_RTV     | 10V (99.3%), 33F (99.3%), 46L (100.0%), 60E (100.0%), 71V (100.0%), 84V (100.0%)                                          | 3     |       | R - Resistance          |
| DRV_RTV_BID | 11I (100.0%), 33F (99.3%), 84V (100.0%)                                                                                   | 2     |       | I - Possible resistance |
| DRV_RTV_QD  | 11I (100.0%), 33F (99.3%), 84V (100.0%)                                                                                   | 3     |       | R - Resistance          |
| LPVr        | 10V (99.3%), 24I (100.0%), 33F (99.3%), 46L (100.0%), 54V (99.1%), 63P (100.0%), 71V (100.0%), 82A (100.0%), 84V (100.0%) | 3     |       | R - Resistance          |

### Integrase Strand Transfer Inhibitors (INSTI)

| Drug    | Mutations list | Range | Color | Interpretation  |
|---------|----------------|-------|-------|-----------------|
| BIC     |                | 1     |       | S - Susceptible |
| CAB     |                | 1     |       | S - Susceptible |
| DTG_BID |                | 1     |       | S - Susceptible |
| DTG_QD  |                | 1     |       | S - Susceptible |
| EVG     |                | 1     |       | S - Susceptible |
| RAL     |                | 1     |       | S - Susceptible |

Signature(s)

Sample ID: CQ022022\_PGM

Source ID: CQ022022\_PGM

MID: n.a.

Subtype: B

## Auto-genotyping results

## HIV-1 PR

Consensus length : 297

| Rank | Subtype | AC       | Score | Match-length | Similarity [%] | Mismatches |
|------|---------|----------|-------|--------------|----------------|------------|
| 1    | B       | MG572010 | 414   | 297          | 92.6           | 22         |
| 2    | B       | AF538303 | 414   | 297          | 92.6           | 22         |
| 3    | B       | AY835758 | 414   | 297          | 92.6           | 22         |
| 4    | BD      | MH234642 | 406   | 297          | 92.3           | 23         |
| 5    | B       | KY112061 | 406   | 297          | 92.3           | 23         |

## HIV-1 RT

Consensus length : 1 617

| Rank | Subtype | AC       | Score | Match-length | Similarity [%] | Mismatches |
|------|---------|----------|-------|--------------|----------------|------------|
| 1    | B       | AY037282 | 2 385 | 1 614        | 93.4           | 106        |
| 2    | B       | D10112   | 2 383 | 1 617        | 93.4           | 107        |
| 3    | B       | AY835778 | 2 369 | 1 614        | 93.3           | 108        |
| 4    | B       | AF004394 | 2 365 | 1 614        | 93.3           | 108        |
| 5    | B       | M38429   | 2 361 | 1 614        | 93.2           | 109        |

## HIV-1 IN

Consensus length : 867

| Rank | Subtype | AC       | Score | Match-length | Similarity [%] | Mismatches |
|------|---------|----------|-------|--------------|----------------|------------|
| 1    | B       | EF637046 | 1 513 | 867          | 97.0           | 26         |
| 2    | B       | U34604   | 1 513 | 867          | 97.0           | 26         |
| 3    | B       | ConsB-IN | 1 513 | 867          | 97.0           | 26         |
| 4    | B       | JQ316129 | 1 505 | 867          | 96.9           | 27         |

IDNS5 version v3.13.0

Drug resistance algorithm ANRS (2022.33/sg/b)

Pipeline name HIV-1 PR+RT\_frag+IN

Pipeline version 2.6.1\_HIV1\_v1.6

Genotyping database version HIV1\_r23u051

Noise filter [%] 0.5

Interpretation cutoff [%] 20.0

Min. read depth [# reads] 50

Number of input reads 337 319

Number of reads mapped 289 704

Mutations HIV-1 PR [(%)

3I (100.0), 10V (99.3), 11I (100.0), 13V (100.0), 16A (100.0), 24I (100.0), 33F (99.3), 37N (100.0), 46L (100.0), 54V (99.1), 60E (100.0), 62V (100.0), 63P (100.0), 71V (100.0), 72T (99.5), 73C (100.0), 82A (100.0), 84V (100.0)

Signature(s)

Sample ID: CQ022022\_PGM

Source ID: CQ022022\_PGM

MID: n.a.

Subtype: B

|   |   |          |       |     |      |    |
|---|---|----------|-------|-----|------|----|
| 5 | B | MH234640 | 1 505 | 867 | 96.9 | 27 |
|---|---|----------|-------|-----|------|----|

## Detailed information

### Mutations HIV-1 RT [(%)]

35M (100.0), 39A (100.0), 41L (100.0), 65R (31.7), 67H (33.4), 67N (66.6), 69D (67.6), 69N (32.4), 70M (28.0), 71G (20.6), 74I (93.4), 75T (100.0), 123N (99.1), 135T (100.0), 138D (100.0), 177E (100.0), 178M (100.0), 181C (100.0), 211T (100.0), 214F (97.2), 215V (96.8), 218E (100.0), 219Q (100.0), 293V (100.0), 297A (100.0), 359S (100.0), 360T (100.0), 376A (100.0), 377V (96.0), 386I (83.3), 390R (99.1), 435A (100.0), 437V (100.0), 460D (99.0), 468S (99.4), 470P (100.0), 491P (100.0), 512K (100.0), 517I (100.0), 519S (100.0), 524E (99.5)

### Mutations HIV-1 IN [(%)]

10E (100.0), 17N (100.0), 31I (100.0), 45G (97.8), 123S (100.0), 125V (99.3), 127K (100.0), 136N (100.0), 201I (100.0), 232D (100.0)

### Created by

CH Versailles

---

**Signature(s)**

Sample ID: CQ032022\_PGM

Source ID: CQ032022\_PGM

MID: n.a.

Subtype: B

## Drug resistances

Drug resistance algorithm: ANRS (2022.33/sg/b)

### Nucleoside Reverse Transcriptase Inhibitors (NRTI)

| Drug    | Mutations list                           | Range | Color | Interpretation          |
|---------|------------------------------------------|-------|-------|-------------------------|
| 3TC_FTC |                                          | 1     |       | S - Susceptible         |
| ABC     | 41L (100.0%), 74V (95.6%), 215C (83.2%)  | 3     |       | R - Resistance          |
| ISL     |                                          | 1     |       | S - Susceptible         |
| TDF_TAF | 41L (100.0%), 74V (95.6%), 215C (83.2%)  | 2     |       | I - Possible resistance |
| ZDV     | 41L (100.0%), 215C (83.2%), 219E (91.1%) | 3     |       | R - Resistance          |

### Non-Nucleoside Reverse Transcriptase Inhibitors (NNRTI)

| Drug | Mutations list                             | Range | Color | Interpretation  |
|------|--------------------------------------------|-------|-------|-----------------|
| DOR  | 100I (100.0%), 103N (100.0%)               | 3     |       | R - Resistance  |
| EFV  | 100I (100.0%), 103N (100.0%)               | 3     |       | R - Resistance  |
| ETR  | 100I (100.0%)                              | 1     |       | S - Susceptible |
| NVP  | 98S (100.0%), 100I (100.0%), 103N (100.0%) | 3     |       | R - Resistance  |
| RPV  | 100I (100.0%), 103N (100.0%)               | 3     |       | R - Resistance  |

### Protease Inhibitors (PI)

| Drug        | Mutations list                                                                                 | Range | Color | Interpretation |
|-------------|------------------------------------------------------------------------------------------------|-------|-------|----------------|
| ATV_RTV     | 10F (99.1%), 33F (100.0%), 71T (100.0%), 84V (100.0%), 90M (100.0%)                            | 3     |       | R - Resistance |
| DRV_RTV_BID | 32I (100.0%), 33F (100.0%), 54L (98.8%), 84V (100.0%), 89V (100.0%)                            | 3     |       | R - Resistance |
| DRV_RTV_QD  | 32I (100.0%), 33F (100.0%), 54L (98.8%), 84V (100.0%), 89V (100.0%)                            | 3     |       | R - Resistance |
| LPVr        | 10F (99.1%), 33F (100.0%), 54L (98.8%), 63P (100.0%), 71T (100.0%), 84V (100.0%), 90M (100.0%) | 3     |       | R - Resistance |

### Integrase Strand Transfer Inhibitors (INSTI)

| Drug    | Mutations list              | Range | Color | Interpretation          |
|---------|-----------------------------|-------|-------|-------------------------|
| BIC     | 140S (100.0%), 148H (97.8%) | 3     |       | R - Resistance          |
| CAB     | 140S (100.0%), 148H (97.8%) | 3     |       | R - Resistance          |
| DTG_BID | 140S (100.0%), 148H (97.8%) | 2     |       | I - Possible resistance |
| DTG_QD  | 140S (100.0%), 148H (97.8%) | 3     |       | R - Resistance          |
| EVG     | 140S (100.0%), 148H (97.8%) | 3     |       | R - Resistance          |
| RAL     | 140S (100.0%), 148H (97.8%) | 3     |       | R - Resistance          |

## Auto-genotyping results

HIV-1 PR

Consensus length : 297

Signature(s)

Sample ID: CQ032022\_PGM

Source ID: CQ032022\_PGM

MID: n.a.

Subtype: B

| Rank | Subtype | AC       | Score | Match-length | Similarity [%] | Mismatches |
|------|---------|----------|-------|--------------|----------------|------------|
| 1    | D       | MN650444 | 408   | 297          | 91.9           | 24         |
| 2    | B       | KY658693 | 408   | 297          | 91.9           | 24         |
| 3    | B       | EF178358 | 408   | 297          | 91.9           | 24         |
| 4    | B       | GQ372066 | 402   | 297          | 91.6           | 25         |
| 5    | D       | MN650466 | 400   | 297          | 91.6           | 25         |

**HIV-1 RT**

Consensus length : 1 158

| Rank | Subtype | AC       | Score | Match-length | Similarity [%] | Mismatches |
|------|---------|----------|-------|--------------|----------------|------------|
| 1    | B       | JF689873 | 1 849 | 1 158        | 95.1           | 57         |
| 2    | B       | M38429   | 1 845 | 1 156        | 95.1           | 57         |
| 3    | B       | AY835769 | 1 841 | 1 158        | 95.0           | 58         |
| 4    | B       | JQ316130 | 1 825 | 1 158        | 94.8           | 60         |
| 5    | B       | KJ140264 | 1 825 | 1 158        | 94.8           | 60         |

**HIV-1 IN**

Consensus length : 867

| Rank | Subtype | AC       | Score | Match-length | Similarity [%] | Mismatches |
|------|---------|----------|-------|--------------|----------------|------------|
| 1    | B       | ConsB-IN | 1 481 | 867          | 96.5           | 30         |
| 2    | B       | KX505396 | 1 457 | 867          | 96.2           | 33         |
| 3    | B       | MW405324 | 1 449 | 867          | 96.1           | 34         |
| 4    | B       | OK181205 | 1 449 | 867          | 96.1           | 34         |
| 5    | B       | KY514083 | 1 449 | 867          | 96.1           | 34         |

**Detailed information**

|                                    |                                                                                                                                                                                                                                               |
|------------------------------------|-----------------------------------------------------------------------------------------------------------------------------------------------------------------------------------------------------------------------------------------------|
| <b>IDNS5 version</b>               | v3.13.0                                                                                                                                                                                                                                       |
| <b>Drug resistance algorithm</b>   | ANRS (2022.33/sg/b)                                                                                                                                                                                                                           |
| <b>Pipeline name</b>               | HIV-1 PR+RT_frag+IN                                                                                                                                                                                                                           |
| <b>Pipeline version</b>            | 2.4.6_HIV1_v1.6                                                                                                                                                                                                                               |
| <b>Genotyping database version</b> | HIV1_r23u051                                                                                                                                                                                                                                  |
| <b>Noise filter [%]</b>            | 0.5                                                                                                                                                                                                                                           |
| <b>Interpretation cutoff [%]</b>   | 20.0                                                                                                                                                                                                                                          |
| <b>Min. read depth [# reads]</b>   | 50                                                                                                                                                                                                                                            |
| <b>Number of input reads</b>       | 573 797                                                                                                                                                                                                                                       |
| <b>Number of reads mapped</b>      | 490 729                                                                                                                                                                                                                                       |
| <b>Mutations HIV-1 PR [(%)]</b>    | 3I (100.0), 10F (99.1), 13V (98.0), 32I (100.0), 33F (100.0), 35D (88.9), 36I (100.0), 37N (100.0), 43Q (20.4), 43T (79.5), 54L (98.8), 63P (100.0), 64V (100.0), 71T (100.0), 72V (100.0), 73T (99.8), 84V (100.0), 89V (100.0), 90M (100.0) |

**Signature(s)**



Sample ID: CQ032022\_PGM

Source ID: CQ032022\_PGM

MID: n.a.

Subtype: B

**Mutations HIV-1 RT [(%)]**

6K (100.0), 41L (100.0), 67G (100.0), 68G (100.0), 74V (95.6), 98S (100.0), 100I (100.0), 103N (100.0), 108I (100.0), 135T (100.0), 177N (99.0), 200I (100.0), 214F (98.1), 215C (83.2), 219E (91.1), 228H (100.0), 272A (100.0), 277K (99.5), 286A (100.0), 297K (97.7), 356K (97.2), 376A (100.0), 379G (21.0)

**Mutations HIV-1 IN [(%)]**

10E (100.0), 20K (100.0), 31I (100.0), 72I (96.6), 101I (96.2), 112M (93.6), 123S (100.0), 124N (100.0), 125V (100.0), 127K (100.0), 140S (100.0), 148H (97.8), 163E (100.0), 207N (99.5), 211T (99.0), 218S (100.0), 232D (100.0), 256E (100.0)

**Created by**

CH Versailles

**Signature(s)**

Sample ID: CQ012023\_PGM

Source ID: CQ012023\_PGM

MID: n.a.

Subtype: B

## Drug resistances

Drug resistance algorithm: ANRS (2022.33/sg/b)

### Nucleoside Reverse Transcriptase Inhibitors (NRTI)

| Drug    | Mutations list                           | Range | Color | Interpretation  |
|---------|------------------------------------------|-------|-------|-----------------|
| 3TC_FTC | 184V (100.0%)                            | 3     |       | R - Resistance  |
| ABC     | 74I (97.5%), 184V (100.0%), 215V (99.6%) | 3     |       | R - Resistance  |
| ISL     | 184V (100.0%)                            | 3     |       | R - Resistance  |
| TDF_TAF | 74I (97.5%), 215V (99.6%)                | 1     |       | S - Susceptible |
| ZDV     | 215V (99.6%), 219E (98.3%)               | 3     |       | R - Resistance  |

### Non-Nucleoside Reverse Transcriptase Inhibitors (NNRTI)

| Drug | Mutations list               | Range | Color | Interpretation          |
|------|------------------------------|-------|-------|-------------------------|
| DOR  | 103N (100.0%)                | 1     |       | S - Susceptible         |
| EFV  | 103N (100.0%)                | 3     |       | R - Resistance          |
| ETR  | 138G (100.0%)                | 2     |       | I - Possible resistance |
| NVP  | 103N (100.0%)                | 3     |       | R - Resistance          |
| RPV  | 103N (100.0%), 138G (100.0%) | 3     |       | R - Resistance          |

### Protease Inhibitors (PI)

| Drug        | Mutations list                                                                                  | Range | Color | Interpretation |
|-------------|-------------------------------------------------------------------------------------------------|-------|-------|----------------|
| ATV_RTV     | 10V (96.2%), 33F (100.0%), 60E (100.0%), 71V (100.0%), 84V (100.0%), 90M (100.0%)               | 3     |       | R - Resistance |
| DRV_RTV_BID | 32I (99.4%), 33F (100.0%), 54L (100.0%), 84V (100.0%), 89V (100.0%)                             | 3     |       | R - Resistance |
| DRV_RTV_QD  | 32I (99.4%), 33F (100.0%), 54L (100.0%), 84V (100.0%), 89V (100.0%)                             | 3     |       | R - Resistance |
| LPVr        | 10V (96.2%), 33F (100.0%), 54L (100.0%), 63P (100.0%), 71V (100.0%), 84V (100.0%), 90M (100.0%) | 3     |       | R - Resistance |

### Integrase Strand Transfer Inhibitors (INSTI)

| Drug    | Mutations list                            | Range | Color | Interpretation  |
|---------|-------------------------------------------|-------|-------|-----------------|
| BIC     |                                           | 1     |       | S - Susceptible |
| CAB     |                                           | 1     |       | S - Susceptible |
| DTG_BID | 97A (100.0%)                              | 1     |       | S - Susceptible |
| DTG_QD  |                                           | 1     |       | S - Susceptible |
| EVG     | 97A (100.0%), 143R (97.3%), 157Q (100.0%) | 3     |       | R - Resistance  |
| RAL     | 143R (97.3%), 157Q (100.0%)               | 3     |       | R - Resistance  |

## Auto-genotyping results

HIV-1 PR

Consensus length : 297

| Rank | Subtype | AC | Score | Match-length | Similarity [%] | Mismatches |
|------|---------|----|-------|--------------|----------------|------------|
|------|---------|----|-------|--------------|----------------|------------|

Signature(s)

Sample ID: CQ012023\_PGM

Source ID: CQ012023\_PGM

MID: n.a.

Subtype: B

|   |   |          |     |     |      |    |
|---|---|----------|-----|-----|------|----|
| 1 | B | MF109418 | 359 | 297 | 90.2 | 29 |
| 2 | B | AB874132 | 359 | 297 | 90.2 | 29 |
| 3 | D | MN694986 | 351 | 297 | 89.9 | 30 |
| 4 | B | KY658703 | 351 | 297 | 89.9 | 30 |
| 5 | D | AF484480 | 351 | 297 | 89.9 | 30 |

## HIV-1 RT

IDNS5 version v3.13.0  
Drug resistance algorithm ANRS (2022.33/sg/b)  
Pipeline name HIV-1 PR+RT\_frag+IN  
Pipeline version 2.7.0\_HIV1\_v1.6  
Genotyping database version HIV1\_r23u051  
Noise filter [%] 0.5  
Interpretation cutoff [%] 20.0  
Min. read depth [# reads] 50  
Number of input reads 185 069  
Number of reads mapped 125 656  
Mutations HIV-1 PR [(%)  
3I (100.0), 10V (96.2), 11L (100.0), 13V (100.0), 14R (98.2), 15V (100.0), 20T (100.0), 32I (99.4), 33F (100.0), 35D (99.1), 36I (100.0), 37N (100.0), 41K (99.5), 54L (100.0), 58E (100.0), 60E (100.0), 61E (100.0), 62V (100.0), 63P (100.0), 71V (100.0), 73N (100.0), 84V

Signature(s)

Sample ID: CQ012023\_PGM

Source ID: CQ012023\_PGM

MID: n.a.

Subtype: B

(100.0), 89V (100.0), 90M (100.0)

Consensus length : 1 158

| Rank | Subtype | AC       | Score | Match-length | Similarity [%] | Mismatches |
|------|---------|----------|-------|--------------|----------------|------------|
| 1    | B       | D10112   | 1 706 | 1 155        | 93.6           | 74         |
| 2    | B       | AF538303 | 1 704 | 1 158        | 93.5           | 75         |
| 3    | B       | JF689873 | 1 696 | 1 158        | 93.4           | 76         |
| 4    | B       | AY835778 | 1 696 | 1 158        | 93.4           | 76         |
| 5    | B       | AF004394 | 1 696 | 1 158        | 93.4           | 76         |

HIV-1 IN

Consensus length : 867

| Rank | Subtype | AC       | Score | Match-length | Similarity [%] | Mismatches |
|------|---------|----------|-------|--------------|----------------|------------|
| 1    | B       | M17451   | 1 441 | 863          | 96.1           | 34         |
| 2    | B       | ConsB-IN | 1 413 | 861          | 95.7           | 37         |
| 3    | B       | MW924814 | 1 382 | 861          | 95.2           | 41         |
| 4    | B       | AY173955 | 1 378 | 863          | 95.1           | 42         |
| 5    | B       | MW059483 | 1 374 | 861          | 95.1           | 42         |

## Detailed information

## Mutations HIV-1 RT [(%)]

35T (100.0), 62V (99.5), 67G (99.4), 68G (100.0), 74I (97.5), 75T (99.6), 103N (100.0), 135V (100.0), 138G (100.0), 162Y (100.0), 173R (88.4), 174K (94.0), 184V (100.0), 194D (87.6), 207A (100.0), 211K (100.0), 214F (100.0), 215V (99.6), 219E (98.3), 232H (100.0), 238T (100.0), 250N (69.1), 277K (100.0), 293V (99.5), 297A (100.0), 333D (98.9), 335C (100.0), 356K (92.6), 357L (99.1), 360T (99.0), 376A (100.0), 379C (21.9), 379G (27.2)

## Mutations HIV-1 IN [(%)]

6E (100.0), 31I (100.0), 72I (98.4), 97A (100.0), 101I (100.0), 111T (100.0), 112V (100.0), 119T (100.0), 123S (100.0), 124N (100.0), 127K (100.0), 142A (97.0), 143R (97.3), 157Q (100.0), 160Q (100.0), 167E (100.0), 218S (100.0), 220M (100.0), 227F (99.4), 230N (99.1), 232D (100.0), 283G (100.0)

## Created by

CH Versailles

Signature(s)

Sample ID: CQ022023\_PGM

Source ID: CQ022023\_PGM

MID: n.a.

Subtype: A

## Drug resistances

Drug resistance algorithm: ANRS (2022.33/sg/b)

### Nucleoside Reverse Transcriptase Inhibitors (NRTI)

| Drug    | Mutations list | Range | Color | Interpretation  |
|---------|----------------|-------|-------|-----------------|
| 3TC_FTC |                | 1     |       | S - Susceptible |
| ABC     |                | 1     |       | S - Susceptible |
| ISL     |                | 1     |       | S - Susceptible |
| TDF_TAF |                | 1     |       | S - Susceptible |
| ZDV     |                | 1     |       | S - Susceptible |

### Non-Nucleoside Reverse Transcriptase Inhibitors (NNRTI)

| Drug | Mutations list | Range | Color | Interpretation  |
|------|----------------|-------|-------|-----------------|
| DOR  | 103N (100.0%)  | 1     |       | S - Susceptible |
| EFV  | 103N (100.0%)  | 3     |       | R - Resistance  |
| ETR  |                | 1     |       | S - Susceptible |
| NVP  | 103N (100.0%)  | 3     |       | R - Resistance  |
| RPV  | 103N (100.0%)  | 1     |       | S - Susceptible |

### Protease Inhibitors (PI)

| Drug        | Mutations list | Range | Color | Interpretation  |
|-------------|----------------|-------|-------|-----------------|
| ATV_RTV     |                | 1     |       | S - Susceptible |
| DRV_RTV_BID | 11I (100.0%)   | 1     |       | S - Susceptible |
| DRV_RTV_QD  | 11I (100.0%)   | 1     |       | S - Susceptible |
| LPVr        |                | 1     |       | S - Susceptible |

### Integrase Strand Transfer Inhibitors (INSTI)

| Drug    | Mutations list | Range | Color | Interpretation  |
|---------|----------------|-------|-------|-----------------|
| BIC     | 74I (100.0%)   | 1     |       | S - Susceptible |
| CAB     | 74I (100.0%)   | 1     |       | S - Susceptible |
| DTG_BID | 74I (100.0%)   | 1     |       | S - Susceptible |
| DTG_QD  | 74I (100.0%)   | 1     |       | S - Susceptible |
| EVG     | 74I (100.0%)   | 1     |       | S - Susceptible |
| RAL     | 74I (100.0%)   | 1     |       | S - Susceptible |

## Auto-genotyping results

HIV-1 PR

Consensus length : 297

Signature(s)

Sample ID: CQ022023\_PGM

Source ID: CQ022023\_PGM

MID: n.a.

Subtype: A

| Rank | Subtype  | AC       | Score | Match-length | Similarity [%] | Mismatches |
|------|----------|----------|-------|--------------|----------------|------------|
| 1    | A        | MH705157 | 484   | 296          | 95.6           | 13         |
| 2    | A1       | AB485632 | 476   | 296          | 95.3           | 14         |
| 3    | CRF02_AG | AY371146 | 476   | 296          | 95.3           | 14         |
| 4    | A7       | MH078558 | 468   | 296          | 94.9           | 15         |
| 5    | CRF01_AE | JX448296 | 468   | 296          | 94.9           | 15         |

**HIV-1 RT**

Consensus length : 1 530

| Rank | Subtype   | AC       | Score | Match-length | Similarity [%] | Mismatches |
|------|-----------|----------|-------|--------------|----------------|------------|
| 1    | AKU       | DQ886038 | 2 350 | 1 530        | 94.1           | 90         |
| 2    | A1        | M62320   | 2 092 | 1 530        | 92.0           | 122        |
| 3    | A3        | AY521631 | 2 068 | 1 526        | 91.8           | 125        |
| 4    | CRF09_cpx | AY093607 | 2 068 | 1 530        | 91.8           | 126        |
| 5    | A1        | AB485632 | 2 064 | 1 526        | 91.7           | 126        |

**HIV-1 IN**

Consensus length : 864

| Rank | Subtype   | AC       | Score | Match-length | Similarity [%] | Mismatches |
|------|-----------|----------|-------|--------------|----------------|------------|
| 1    | A3        | AY521629 | 1 411 | 864          | 95.6           | 38         |
| 2    | AKU       | DQ886038 | 1 411 | 864          | 95.6           | 38         |
| 3    | CRF45_cpx | FN392874 | 1 396 | 864          | 95.2           | 41         |
| 4    | A6        | MN703137 | 1 394 | 864          | 95.2           | 41         |
| 5    | CRF45_cpx | FN392877 | 1 392 | 860          | 95.3           | 40         |

**Detailed information**

|                                    |                                                                                                                                            |
|------------------------------------|--------------------------------------------------------------------------------------------------------------------------------------------|
| <b>IDNS5 version</b>               | v3.13.0                                                                                                                                    |
| <b>Drug resistance algorithm</b>   | ANRS (2022.33/sg/b)                                                                                                                        |
| <b>Pipeline name</b>               | HIV-1 PR+RT_frag+IN                                                                                                                        |
| <b>Pipeline version</b>            | 2.7.0_HIV1_v1.6                                                                                                                            |
| <b>Genotyping database version</b> | HIV1_r23u051                                                                                                                               |
| <b>Noise filter [%]</b>            | 0.5                                                                                                                                        |
| <b>Interpretation cutoff [%]</b>   | 20.0                                                                                                                                       |
| <b>Min. read depth [# reads]</b>   | 50                                                                                                                                         |
| <b>Number of input reads</b>       | 288 596                                                                                                                                    |
| <b>Number of reads mapped</b>      | 159 175                                                                                                                                    |
| <b>Mutations HIV-1 PR [(%)]</b>    | 3I (100.0), 10M (100.0), 11I (100.0), 13V (100.0), 20I (100.0), 35D (99.6), 36I (100.0), 37N (100.0), 41K (100.0), 69K (91.7), 89M (100.0) |

**Signature(s)**

Sample ID: CQ022023\_PGM

Source ID: CQ022023\_PGM

MID: n.a.

Subtype: A

**Mutations HIV-1 RT [(%)]**

6K (98.7), 11T (100.0), 28A (100.0), 35T (100.0), 39E (99.4), 103N (100.0), 123S (98.9), 135T (100.0), 173A (84.3), 174K (96.7), 177E (100.0), 196E (100.0), 203A (100.0), 207E (100.0), 211K (100.0), 245Q (100.0), 248D (100.0), 250E (100.0), 277K (100.0), 286A (100.0), 292I (100.0), 293V (98.3), 297R (97.8), 326V (100.0), 335D (100.0), 356K (100.0), 357K (93.6), 359S (98.7), 369A (100.0), 371V (100.0), 375R (45.6), 375V (43.3), 376V (44.1), 376H (46.6), 377Q (45.2), 377L (42.6), 379C (20.6), 379G (20.2), 395R (99.4), 403V (100.0), 432D (93.8), 435A (99.0), 458I (100.0), 460D (100.0), 461K (99.3), 468S (99.2), 471E (100.0), 480H (98.9)

**Mutations HIV-1 IN [(%)]**

10E (100.0), 11D (100.0), 24N (99.3), 42R (100.0), 63I (99.4), 72I (87.5), 74I (100.0), 112I (97.1), 113V (100.0), 123S (100.0), 124N (100.0), 125A (100.0), 127K (100.0), 134D (100.0), 167E (100.0), 201I (100.0), 206S (100.0), 232D (100.0), 234I (100.0), 255T (100.0), 283G (100.0)

**Created by**

CH Versailles

**Signature(s)**

Sample ID: CQ042023\_PGM

Source ID: CQ042023\_PGM

MID: n.a.

Subtype: B

## Drug resistances

Drug resistance algorithm: ANRS (2022.33/sg/b)

### Nucleoside Reverse Transcriptase Inhibitors (NRTI)

| Drug    | Mutations list                                         | Range | Color  | Interpretation          |
|---------|--------------------------------------------------------|-------|--------|-------------------------|
| 3TC_FTC |                                                        | 1     | Green  | S - Susceptible         |
| ABC     | 41L (100.0%), 215F (85.2%)                             | 2     | Yellow | I - Possible resistance |
| ISL     |                                                        | 1     | Green  | S - Susceptible         |
| TDF_TAF | 41L (100.0%), 215F (85.2%)                             | 1     | Green  | S - Susceptible         |
| ZDV     | 41L (100.0%), 70R (100.0%), 215F (85.2%), 219E (93.8%) | 3     | Red    | R - Resistance          |

### Non-Nucleoside Reverse Transcriptase Inhibitors (NNRTI)

| Drug | Mutations list              | Range | Color  | Interpretation          |
|------|-----------------------------|-------|--------|-------------------------|
| DOR  | 98G (100.0%), 181C (100.0%) | 2     | Yellow | I - Possible resistance |
| EFV  | 181C (100.0%)               | 3     | Red    | R - Resistance          |
| ETR  | 98G (100.0%), 181C (100.0%) | 3     | Red    | R - Resistance          |
| NVP  | 181C (100.0%)               | 3     | Red    | R - Resistance          |
| RPV  | 98G (100.0%), 181C (100.0%) | 3     | Red    | R - Resistance          |

### Protease Inhibitors (PI)

| Drug        | Mutations list                                                                   | Range | Color | Interpretation  |
|-------------|----------------------------------------------------------------------------------|-------|-------|-----------------|
| ATV_RTV     | 10I (99.3%), 71V (100.0%), 90M (100.0%)                                          | 3     | Red   | R - Resistance  |
| DRV_RTV_BID |                                                                                  | 1     | Green | S - Susceptible |
| DRV_RTV_QD  |                                                                                  | 1     | Green | S - Susceptible |
| LPVr        | 10I (99.3%), 54V (99.5%), 63P (100.0%), 71V (100.0%), 82A (100.0%), 90M (100.0%) | 3     | Red   | R - Resistance  |

### Integrase Strand Transfer Inhibitors (INSTI)

| Drug    | Mutations list | Range | Color | Interpretation  |
|---------|----------------|-------|-------|-----------------|
| BIC     |                | 1     | Green | S - Susceptible |
| CAB     |                | 1     | Green | S - Susceptible |
| DTG_BID |                | 1     | Green | S - Susceptible |
| DTG_QD  |                | 1     | Green | S - Susceptible |
| EVG     |                | 1     | Green | S - Susceptible |
| RAL     |                | 1     | Green | S - Susceptible |

## Auto-genotyping results

HIV-1 PR

Consensus length : 297

Signature(s)



Sample ID: CQ042023\_PGM

Source ID: CQ042023\_PGM

MID: n.a.

Subtype: B

| Rank | Subtype | AC       | Score | Match-length | Similarity [%] | Mismatches |
|------|---------|----------|-------|--------------|----------------|------------|
| 1    | B       | AB873943 | 462   | 293          | 94.9           | 15         |
| 2    | B       | FJ469753 | 462   | 293          | 94.9           | 15         |
| 3    | B       | OK181187 | 454   | 293          | 94.5           | 16         |
| 4    | BD      | MH234642 | 454   | 293          | 94.5           | 16         |
| 5    | B       | KY112061 | 454   | 293          | 94.5           | 16         |

**HIV-1 RT**

Consensus length : 1 236

| Rank | Subtype | AC       | Score | Match-length | Similarity [%] | Mismatches |
|------|---------|----------|-------|--------------|----------------|------------|
| 1    | B       | FJ469685 | 1 957 | 1 239        | 94.8           | 62         |
| 2    | B       | AY835778 | 1 957 | 1 239        | 94.8           | 62         |
| 3    | B       | AF538307 | 1 957 | 1 239        | 94.8           | 62         |
| 4    | B       | AF538303 | 1 957 | 1 239        | 94.8           | 62         |
| 5    | B       | K03455   | 1 957 | 1 239        | 94.8           | 62         |

**HIV-1 IN**

Consensus length : 867

| Rank | Subtype | AC       | Score | Match-length | Similarity [%] | Mismatches |
|------|---------|----------|-------|--------------|----------------|------------|
| 1    | B       | ConsB-IN | 1 497 | 867          | 96.8           | 28         |
| 2    | B       | D10112   | 1 473 | 867          | 96.4           | 31         |
| 3    | B       | AB564745 | 1 473 | 867          | 96.4           | 31         |
| 4    | B       | AY173960 | 1 473 | 867          | 96.4           | 31         |
| 5    | B       | GQ371811 | 1 467 | 867          | 96.3           | 32         |

**Detailed information**

|                                    |                                                                                                                                                                                 |
|------------------------------------|---------------------------------------------------------------------------------------------------------------------------------------------------------------------------------|
| <b>IDNS5 version</b>               | v3.13.0                                                                                                                                                                         |
| <b>Drug resistance algorithm</b>   | ANRS (2022.33/sg/b)                                                                                                                                                             |
| <b>Pipeline name</b>               | HIV-1 PR+RT_frag+IN                                                                                                                                                             |
| <b>Pipeline version</b>            | 2.7.0_HIV1_v1.6                                                                                                                                                                 |
| <b>Genotyping database version</b> | HIV1_r23u051                                                                                                                                                                    |
| <b>Noise filter [%]</b>            | 0.5                                                                                                                                                                             |
| <b>Interpretation cutoff [%]</b>   | 20.0                                                                                                                                                                            |
| <b>Min. read depth [# reads]</b>   | 50                                                                                                                                                                              |
| <b>Number of input reads</b>       | 244 915                                                                                                                                                                         |
| <b>Number of reads mapped</b>      | 197 317                                                                                                                                                                         |
| <b>Mutations HIV-1 PR [(%)]</b>    | 3I (100.0), 10I (99.3), 15V (100.0), 35D (99.6), 36I (100.0), 37N (100.0), 41K (99.4), 54V (99.5), 62V (100.0), 63P (100.0), 71V (100.0), 73S (100.0), 82A (100.0), 90M (100.0) |

**Signature(s)**

Sample ID: CQ042023\_PGM

Source ID: CQ042023\_PGM

MID: n.a.

Subtype: B

**Mutations HIV-1 RT [(%)]**

4T (100.0), 31M (24.8), 36D (100.0), 41L (100.0), 43E (100.0), 67- (76.1), 69G (99.5), 70R (100.0), 98G (100.0), 108I (100.0), 122K (100.0), 123E (100.0), 135T (100.0), 178M (100.0), 181C (100.0), 211K (100.0), 214F (98.8), 215F (85.2), 219E (93.8), 277K (99.1), 293V (100.0), 334H (100.0), 356K (93.7), 359S (99.1), 360T (100.0), 376A (100.0), 379C (21.3), 399K (32.7), 400A (98.9), 401\* (30.7)

**Mutations HIV-1 IN [(%)]**

10E (100.0), 17N (100.0), 28I (99.7), 30A (100.0), 39C (100.0), 112V (100.0), 119P (100.0), 123S (100.0), 124T (100.0), 127K (100.0), 201I (100.0), 232D (100.0), 234I (100.0), 253E (98.3), 286N (99.3)

**Created by**

CH Versailles

**Signature(s)**
